# Supplementary material for: Photochemical enrichment of dissolved organic matter from different soils of a tidal river basin: significance to estuarine carbon cycle
Source: Frontiers journal article supplement (doi:10.3389/fmars.2024.1400196), 2024-06-28
Supplement: Table_1.docx [file Table_1.docx]

**Table S1** Natural sunlight irradiation intensity and UV intensity during photochemical experiments. Light intensity and weather conditions were recorded every morning, noon and afternoon.

| Date | Time | Light intensity (lx) | Comment | Ultraviolet intensity(μW/cm2) | Comment |
| --- | --- | --- | --- | --- | --- |
| 2022/9/2 | 10:30 | 94500 | sunshine | 5450 |  |
|  | 15:00 | 85000 |  | 3100 |  |
|  | 18:30 | 270 |  | 10 |  |
| 2022/9/3 | 9:30 | 80000 | sunshine | 3000 |  |
|  | 14:15 | 75000 |  | 3000 |  |
|  | 19:00 | 20 |  | 0 |  |
| 2022/9/4 | 10:00 | 23000 | Cloudy | 870 |  |
|  | 13:00 | 110000 | Cloudy:60000 | 5100 | Cloudy:3000 |
|  | 18:40 | 100 |  | 3 |  |
| 2022/9/5 | 9:30 | 73000 |  | 2400 |  |
|  | 11:00 | 80000 | Cloudy:65000 | 2800 | Cloudy:1500 |
|  | 17:00 | 10000 |  | 490 |  |
| 2022/9/6 | 10:00 | 78000 | sunshine | 3600 |  |
|  | 14:30 | 54000 |  | 2500 |  |
|  | 17:00 | 11000 |  | 500 |  |
| 2022/9/7 | 10:00 | 122000 | Cloudless | 6000 |  |
|  | 12:00 | 123000 |  | 6100 |  |
|  | 17:00 | 12000 |  | 500 |  |
| 2022/9/8 | 10:00 | 60000 | Cloudy | 3000 |  |
|  | 16:00 | 52000 |  | 2500 |  |
